# Supplementary material for: Exploring patterns of accelerometry-assessed physical activity in elderly people
Source: PubMed Central journal article supplement (PMC4016218; doi:10.1186/1479-5868-11-28), 2014-02-28

**Figure S1A-C**

**A**

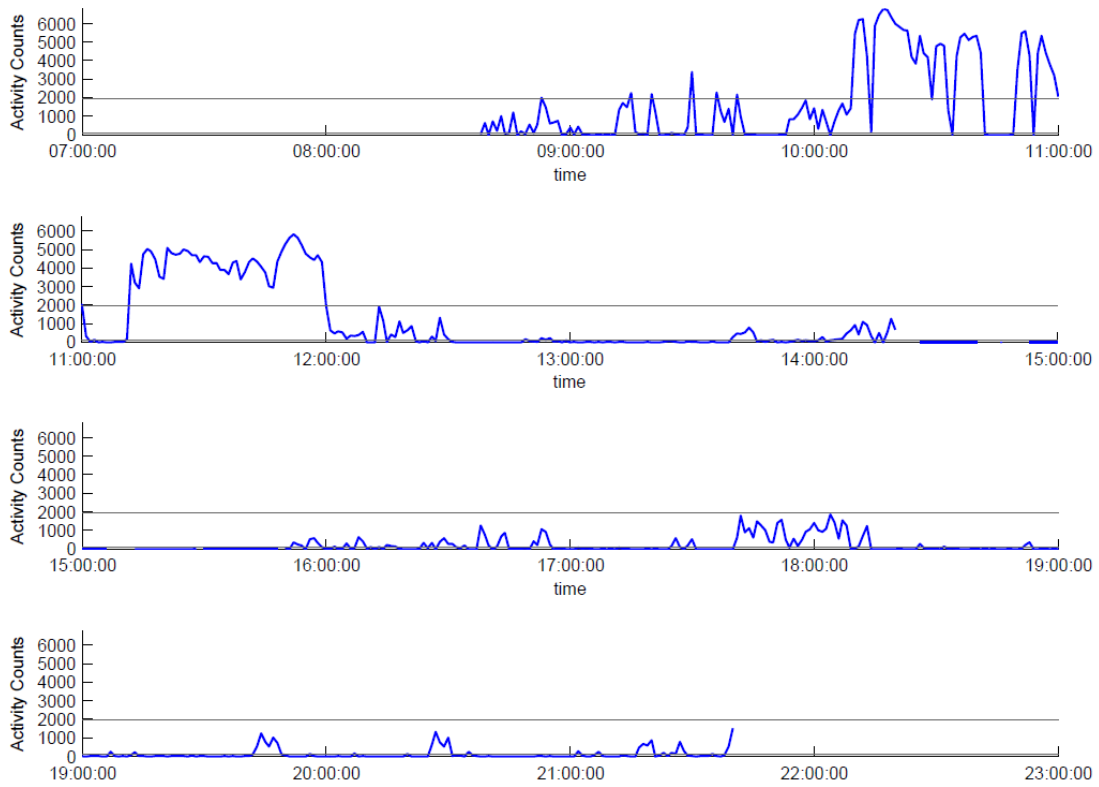

**B**

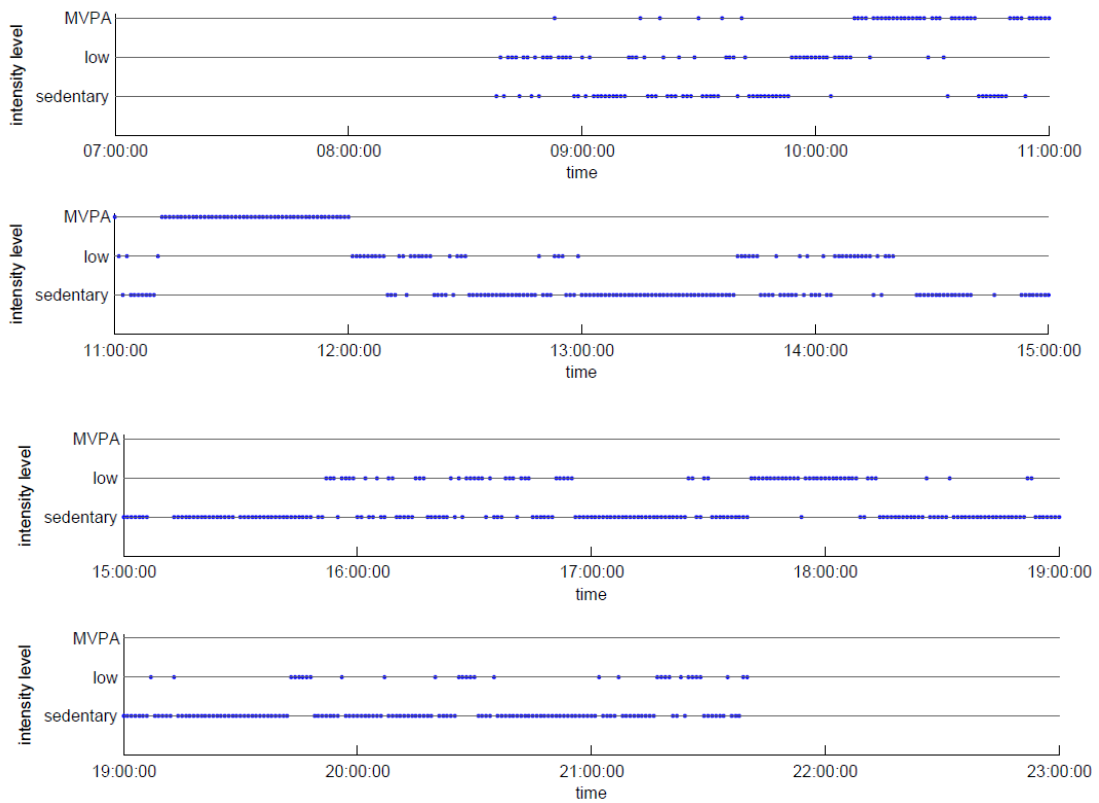

C

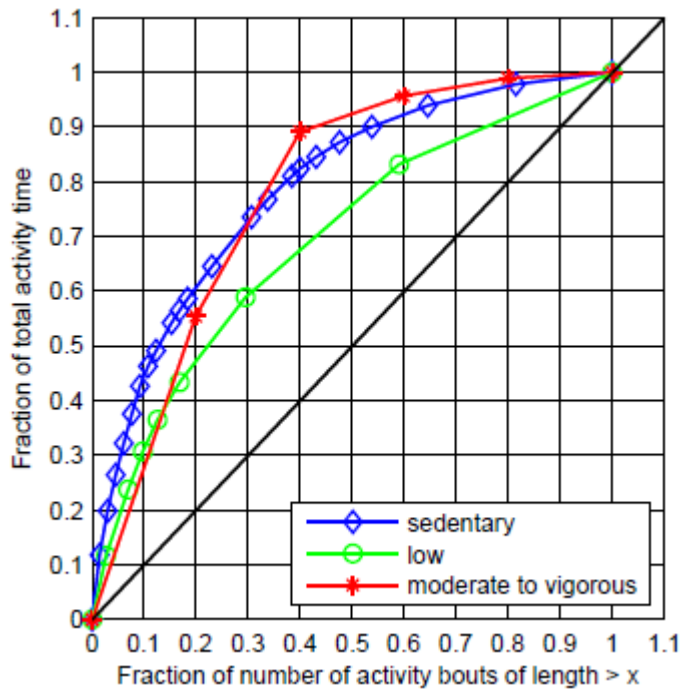

**Figure S2A-C**

**A**

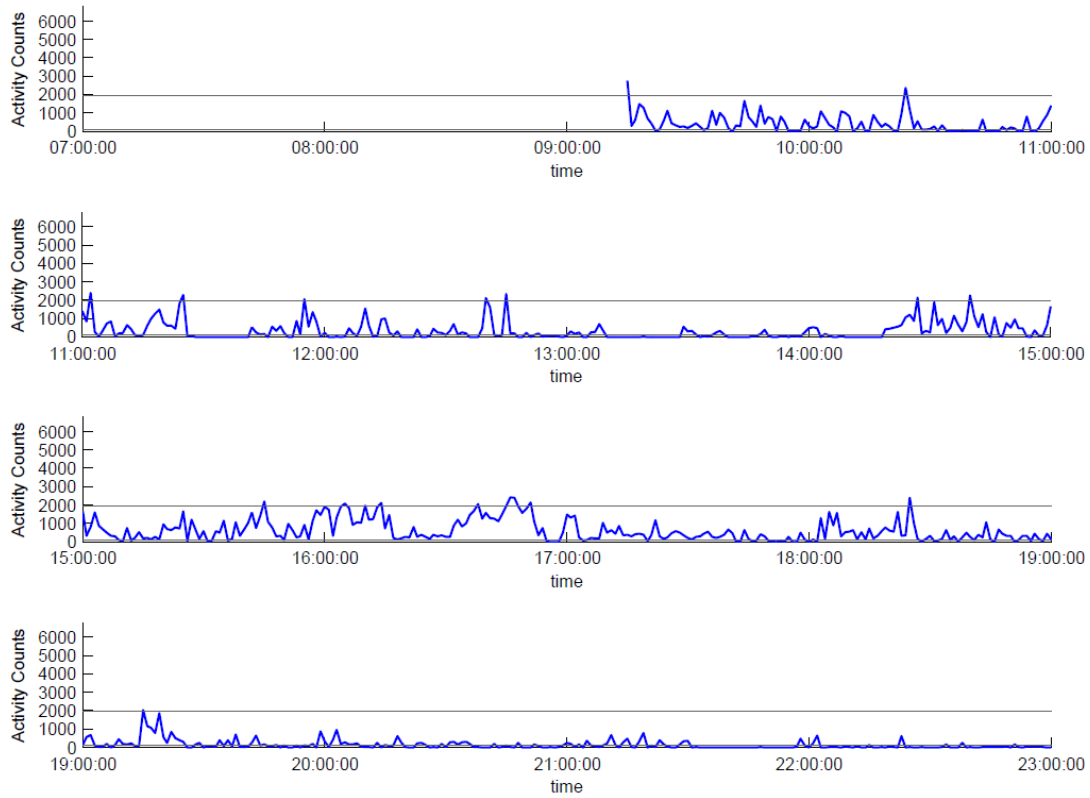

**B**

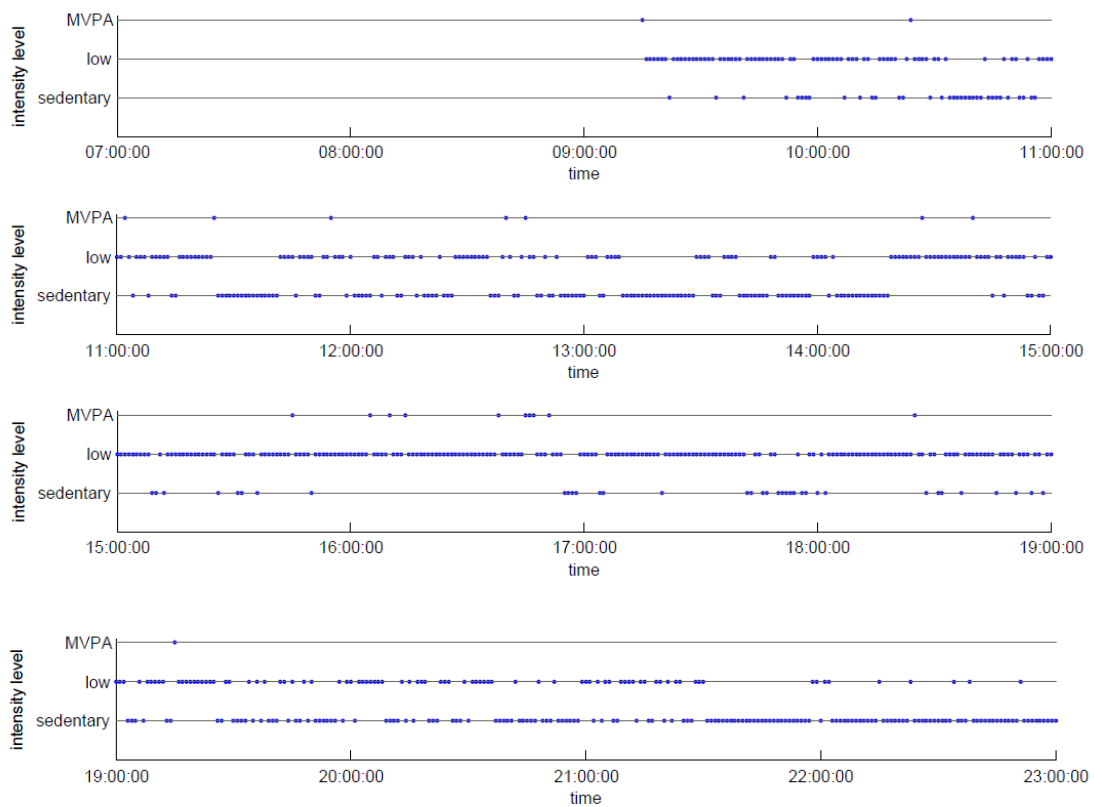

C

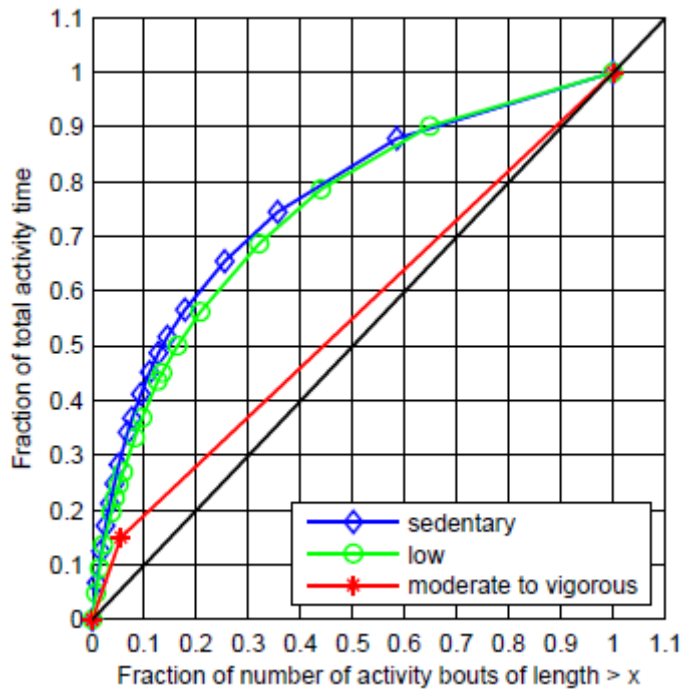

Supplement: 1479-5868-11-28-S3.pdf [file 1479-5868-11-28-S3.pdf]
